# Supplementary material
Source: PubMed Central journal article supplement (PMC8427657)
Supplement: NIHMS1734283-supplement-1.pdf [file NIHMS1734283-supplement-1.pdf]

## Cryo-EM data collection, refinement and validation statistics

|                                                     | ACLY–OAA–acetyl-CoA<br>(EMD-23413, PDB 7LLA) | ACLY–OAA–acetyl-CoA<br>(local refinement on ASH domain)<br>(EMD-23389, PDB 7LJ9) | ACLY-E599Q–ATP–citrate–CoA (local refinement on ASH domain)<br>(EMD-23387, PDB 7LIW) |
|-----------------------------------------------------|----------------------------------------------|----------------------------------------------------------------------------------|--------------------------------------------------------------------------------------|
| <b>Data collection and processing</b>               |                                              |                                                                                  |                                                                                      |
| Magnification                                       | 45,000                                       | 45,000                                                                           | 45,000                                                                               |
| Voltage (kV)                                        | 200                                          | 200                                                                              | 200                                                                                  |
| Electron exposure (e <sup>-</sup> /Å <sup>2</sup> ) | 37                                           | 37                                                                               | 40                                                                                   |
| Defocus range (μm)                                  | 0.9-2.8                                      | 0.9-2.8                                                                          | 1.0-2.0                                                                              |
| Pixel size (Å)                                      | 0.87                                         | 0.87                                                                             | 0.87                                                                                 |
| Symmetry imposed                                    | D2                                           | C1                                                                               | C1                                                                                   |
| Initial particle images (no.)                       | 719,613                                      | 434,952                                                                          | 1,303,057                                                                            |
| Final particle images (no.)                         | 108,738                                      | 205,702                                                                          | 1,124,928                                                                            |
| Map resolution (Å)                                  | 3.0                                          | 3.0                                                                              | 2.9                                                                                  |
| FSC threshold                                       | 0.143                                        | 0.143                                                                            | 0.143                                                                                |
| Map resolution range (Å)                            | 2.8-4.0                                      | 2.8-4.0                                                                          | 2.7-3.6                                                                              |
| <b>Refinement</b>                                   |                                              |                                                                                  |                                                                                      |
| Initial model used (PDB code)                       | 6UI9                                         | 6UI9                                                                             | 6UUW                                                                                 |
| Model resolution (Å)                                | 3.3                                          | 3.4                                                                              | 3.0                                                                                  |
| FSC threshold                                       | 0.5                                          | 0.5                                                                              | 0.5                                                                                  |
| Model resolution range (Å)                          | -                                            | -                                                                                | -                                                                                    |
| Map sharpening <i>B</i> factor (Å <sup>2</sup> )    | -123.2                                       | -93.4                                                                            | -119.5                                                                               |
| Model composition                                   |                                              |                                                                                  |                                                                                      |
| Non-hydrogen atoms                                  | 31,925                                       | 14,520                                                                           | 14,638                                                                               |
| Protein residues                                    | 4,083                                        | 1,865                                                                            | 1,871                                                                                |
| Ligands                                             | 12                                           | 6                                                                                | 3                                                                                    |
| R.m.s. deviations                                   |                                              |                                                                                  |                                                                                      |
| Bond lengths (Å)                                    | 0.002                                        | 0.004                                                                            | 0.003                                                                                |
| Bond angles (°)                                     | 0.535                                        | 0.668                                                                            | 0.543                                                                                |
| <b>Validation</b>                                   |                                              |                                                                                  |                                                                                      |
| MolProbity score                                    | 1.65                                         | 1.95                                                                             | 1.53                                                                                 |
| Clashscore                                          | 8.82                                         | 10.63                                                                            | 8.72                                                                                 |
| Poor rotamers (%)                                   | 0                                            | 0.07                                                                             | 0.26                                                                                 |
| Ramachandran plot                                   |                                              |                                                                                  |                                                                                      |
| Favored (%)                                         | 96.97                                        | 93.96                                                                            | 97.74                                                                                |
| Allowed (%)                                         | 3.30                                         | 6.04                                                                             | 2.26                                                                                 |
| Disallowed (%)                                      | 0                                            | 0                                                                                | 0                                                                                    |

### SUPPLEMENTARY NOTE

To improve the local resolution of the ASH domains and their bound ligands to generate revised ACLY–OAA–acetyl-CoA (PDB-7LJ9/EMBD-23389) and ACLY-E599Q–ATP–citrate–CoA (PDB-7LIW/EMBD-23387), we followed a previously reported strategy to perform particle symmetry expansion to put all four ASH domains in the same position<sup>4</sup>. Three redundant copies of ASH domains were removed by particle subtraction. Ab-initio models were generated based on partial particles composed of a CSH-module (tetramer) + ASH domain monomer. A good 3D class was selected after heterogenous refinement,

then autorefinement was performed on the good class. ACLY–OAA–acetyl-CoA (PDB-7LLA/EMBD-23413) was generated as described above but without local refinement.
